# Supplementary material for: Paclitaxel-loaded cubosome lipid nanocarriers stabilised with pH and hydrogen peroxide-responsive steric stabilisers as drug delivery vehicles
Source: Royal Society of Chemistry journal article supplement (doi:10.1039/d2tb01530g), 2022-11-25
Supplement: d2tb01530g1.pdf [file d2tb01530g1.pdf]

## **Paclitaxel-loaded cubosome lipid nanocarriers stabilised with pH and hydrogen peroxide-responsive steric stabilisers as drug delivery vehicles**

Xudong Cai<sup>1</sup>, Bo Fan<sup>2</sup>, San H. Thang<sup>2</sup>, Calum J. Drummond<sup>1\*</sup>, Nhiem Tran<sup>1\*</sup>, and Jiali Zhai<sup>1\*</sup>

<sup>1</sup>School of Science, STEM college, RMIT University, Melbourne, VIC 3000, Australia

<sup>2</sup>School of Chemistry, Monash University, Clayton, VIC 3800, Australia

Corresponding authors:

Dr Jiali Zhai; [maggie.zhai@rmit.edu.au](mailto:maggie.zhai@rmit.edu.au)

Dr Nhiem Tran; [nhiem.tran@rmit.edu.au](mailto:nhiem.tran@rmit.edu.au)

Professor Calum Drummond; [calum.drummond@rmit.edu.au](mailto:calum.drummond@rmit.edu.au)

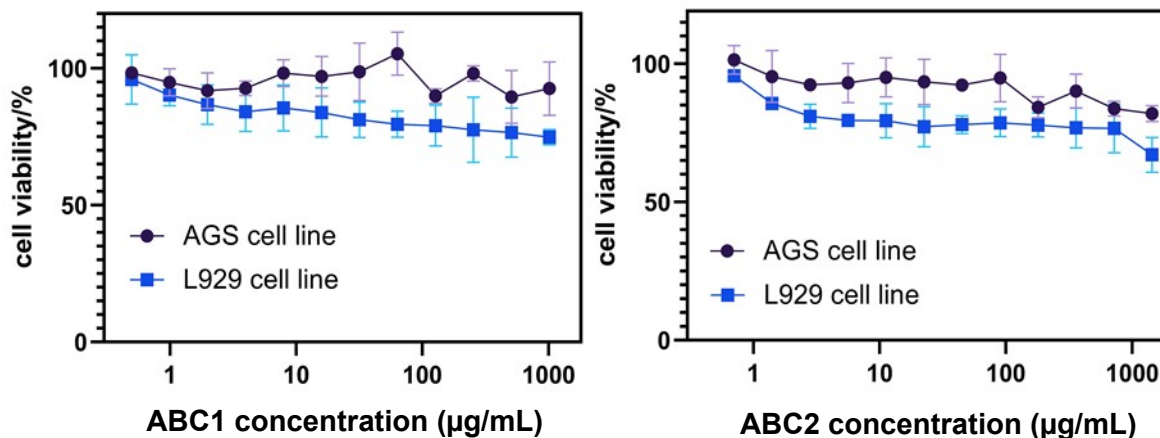

**Figure S1:** Cytotoxicity of ABC1 and ABC2 copolymers in both AGS cells and L929 cells.

**Table S1:** The concentration conversion between MO and PTX in PTX-loaded nanoparticle formulations. Due to the differences in encapsulation efficiency, the MO concentration was different in the three nanoparticle formulations containing the same amount of PTX.

| PTX (µg/mL) | 10                        | 5     | 2.5   | 1.25  | 0.625 | 0.312 | 0.16 | 0.078 | 0.039 |
|-------------|---------------------------|-------|-------|-------|-------|-------|------|-------|-------|
|             | MO concentration ((µg/mL) |       |       |       |       |       |      |       |       |
| PTX@F127-NP | 166.7                     | 83.35 | 41.67 | 20.84 | 10.42 | 5.21  | 2.61 | 1.3   | 0.65  |
| PTX@ABC1-NP | 153.8                     | 76.9  | 38.45 | 19.22 | 9.61  | 4.8   | 2.4  | 1.2   | 0.6   |
| PTX@ABC2-NP | 181.8                     | 90.9  | 45.45 | 22.73 | 11.36 | 5.68  | 2.84 | 1.42  | 0.71  |
